# Supplementary material for: Biogeographic Analysis Suggests Two Types of Planktonic Prokaryote Communities in the Barents Sea
Source: MDPI journal article supplement (doi:10.3390/biology12101310), 2023-10-05
Supplement: s1 [file s1]

Supplementary materials

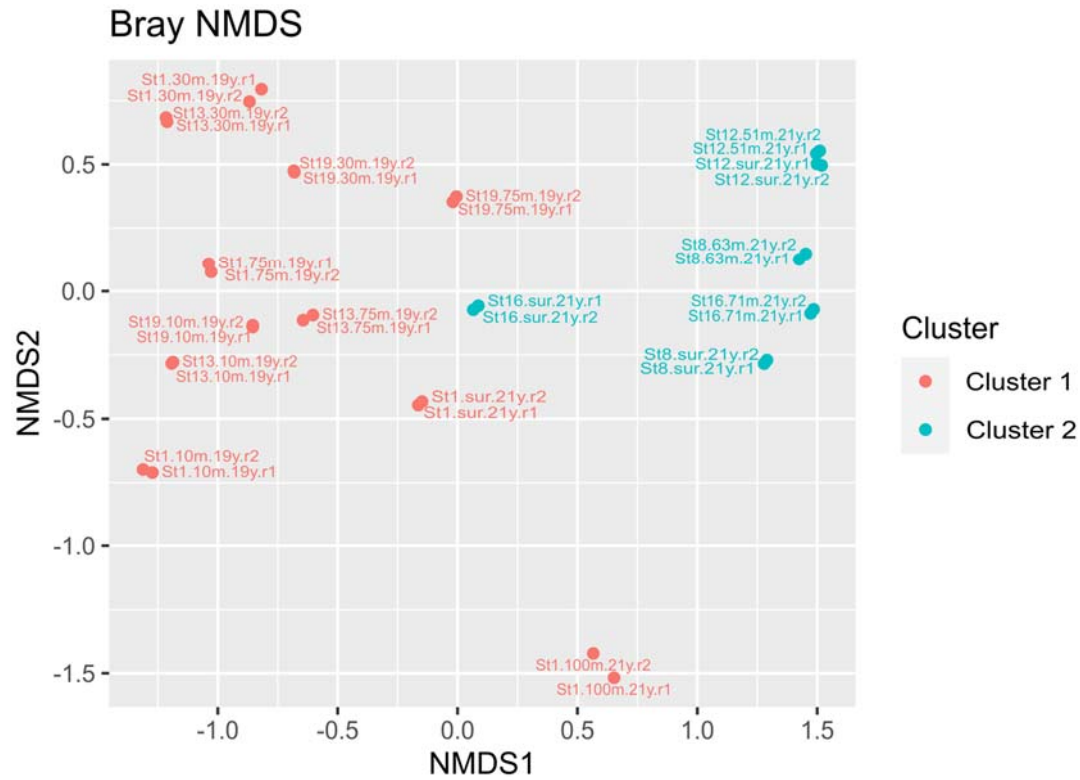

**Figure S1.** Nonmetric multidimensional scaling (NMDS) ordination of variation based on weighted Bray-Curtis dissimilarity for comparing technical replicates

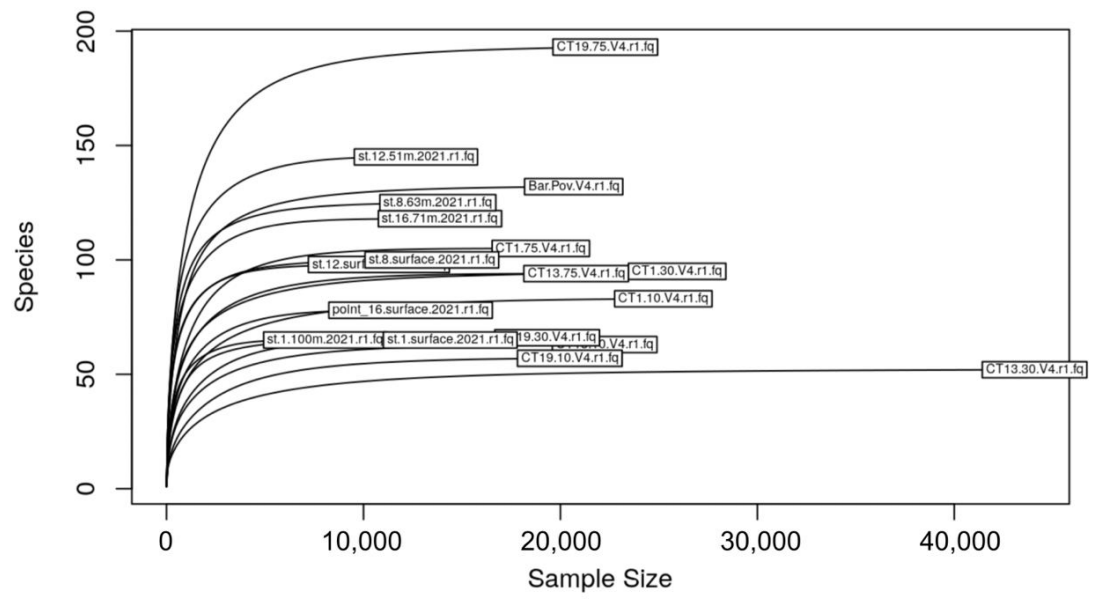

**Figure S2.** Rarefaction curves of the Barents Sea samples.

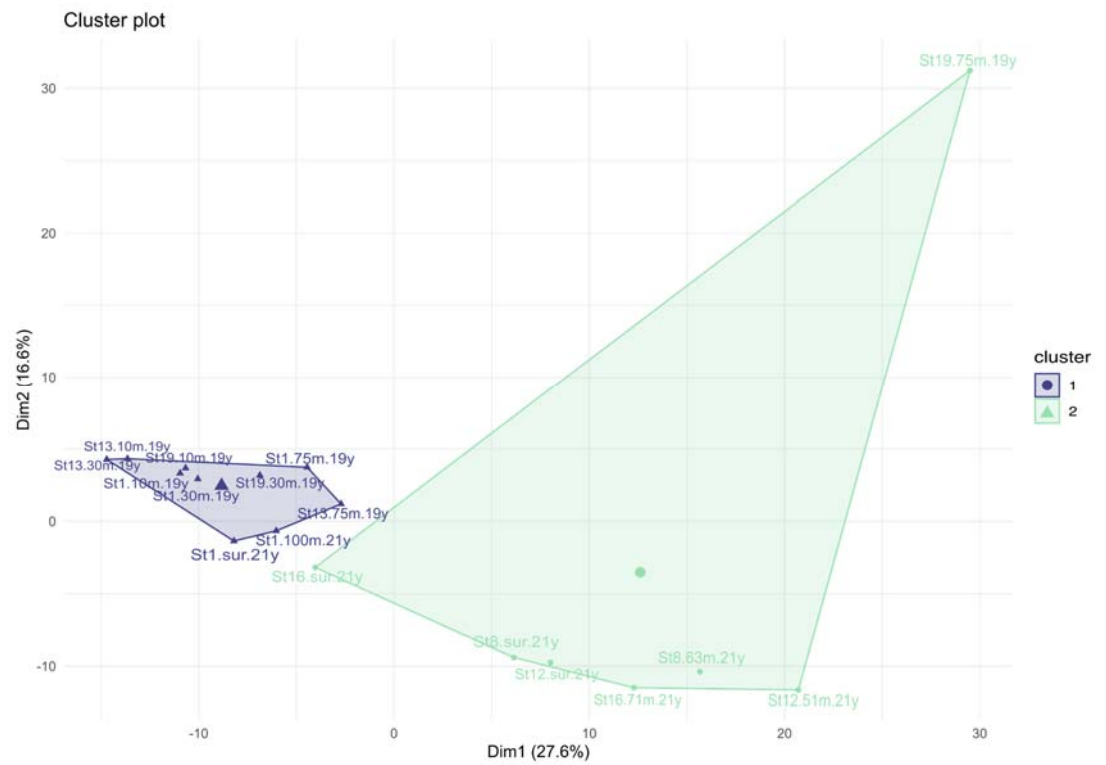

**Figure S3.** PCA ordination of samples based on the Euclidean distances between data points. Analysis showed that x-axis (Dim1, equals to PC=principal component), accounts for 27.6% of the total variation, while the y-axis (Dim2) accounts for 16.6% of the variation.

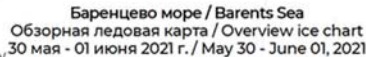

**Figure S4.** Overview ice chart of the Barents Sea 2 weeks before 2021 sampling. The yellow line shows a section between Novaya Zemlya and Franz Josef Land.

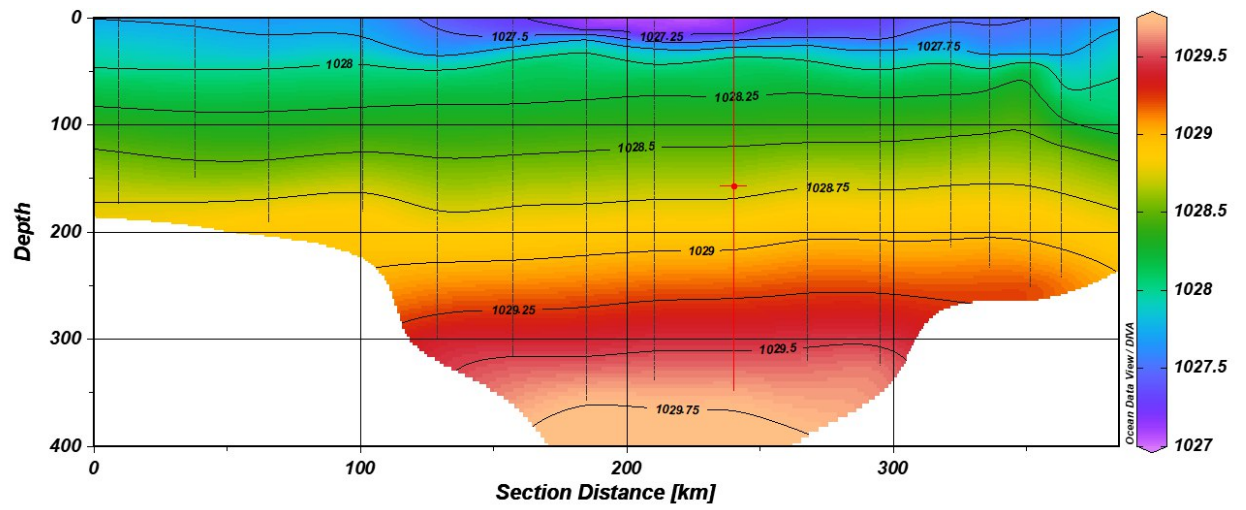

**Figure S5.** The density profile of the section between Novaya Zemlya and Franz Josef Land.

**Table S1.** Clusterization of samples

|                     | Shannon | Simpson | InvSimpson | Fisher | PD (Feit) | Flow      |
|---------------------|---------|---------|------------|--------|-----------|-----------|
| <b>St1.10m.19y</b>  | 1.679   | 0.562   | 2.284      | 10.686 | 15.229    | Cluster 1 |
| <b>St1.30m.19y</b>  | 2.525   | 0.845   | 6.440      | 12.429 | 14.875    | Cluster 1 |
| <b>St1.75m.19y</b>  | 2.714   | 0.878   | 8.193      | 14.646 | 21.515    | Cluster 1 |
| <b>St13.10m.19y</b> | 1.864   | 0.740   | 3.850      | 7.936  | 12.168    | Cluster 1 |
| <b>St13.30m.19y</b> | 1.876   | 0.794   | 4.852      | 5.822  | 11.684    | Cluster 1 |
| <b>St13.75m.19y</b> | 2.133   | 0.742   | 3.871      | 12.700 | 17.082    | Cluster 1 |
| <b>St19.10m.19y</b> | 1.795   | 0.753   | 4.051      | 7.162  | 10.639    | Cluster 1 |
| <b>St19.30m.19y</b> | 2.010   | 0.763   | 4.217      | 8.544  | 13.418    | Cluster 1 |
| <b>St19.75m.19y</b> | 2.811   | 0.748   | 3.968      | 29.050 | 31.864    | Cluster 1 |
| <b>St1.sur.21y</b>  | 2.367   | 0.804   | 5.105      | 8.780  | 11.713    | Cluster 1 |
| <b>St1.100m.21y</b> | 2.528   | 0.831   | 5.906      | 9.662  | 14.766    | Cluster 1 |
| <b>St16.sur.21y</b> | 1.981   | 0.669   | 3.020      | 11.115 | 19.015    | Cluster 2 |
| <b>St16.71m.21y</b> | 3.389   | 0.928   | 13.878     | 17.702 | 20.270    | Cluster 2 |
| <b>St12.sur.21y</b> | 3.241   | 0.920   | 12.572     | 14.877 | 16.873    | Cluster 2 |
| <b>St12.51m.21y</b> | 3.456   | 0.924   | 13.164     | 22.963 | 27.396    | Cluster 2 |
| <b>St8.sur.21y</b>  | 3.063   | 0.880   | 8.357      | 14.652 | 16.648    | Cluster 2 |
| <b>St8.63m.21y</b>  | 3.508   | 0.944   | 17.809     | 18.971 | 23.389    | Cluster 2 |
